# Supplementary material for: Fungal phytochrome chromophore biosynthesis at mitochondria
Source: PubMed Central journal article supplement — EMBO J. 2021 Jul 13;40(17):e108083. doi: 10.15252/embj.2021108083 (PMC8447599; doi:10.15252/embj.2021108083), 2021-07-13

**Fig. 5: HoxA, HoxB and PGP expression in *E. coli***

Coomassie

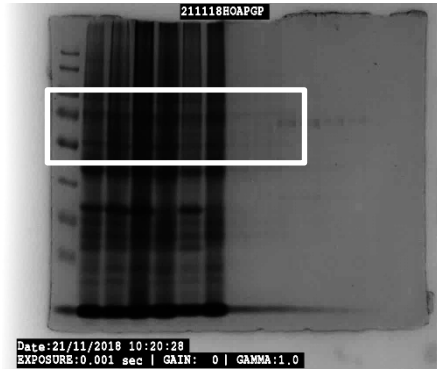

Picture of the membrane with prestained marker

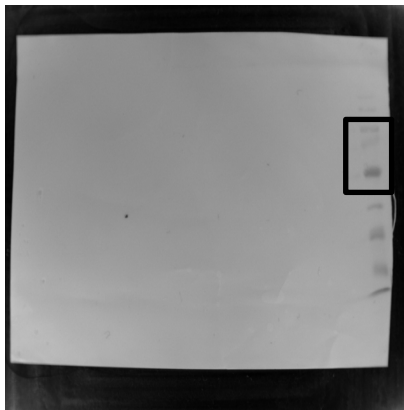

Western Blot with Anti-His antibody

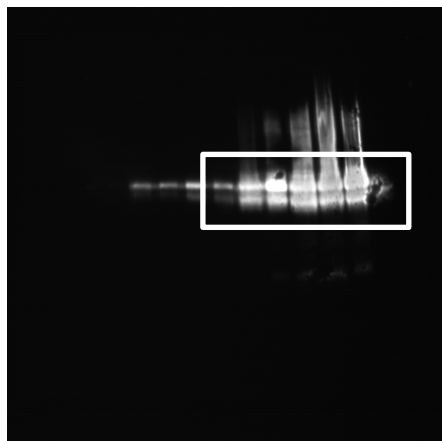

Supplement: EMBJ-40-e108083-s002.pdf [file EMBJ-40-e108083-s002.pdf]
