# Supplementary material for: Fungal phytochrome chromophore biosynthesis at mitochondria
Source: PubMed Central journal article supplement — EMBO J. 2021 Jul 13;40(17):e108083. doi: 10.15252/embj.2021108083 (PMC8447599; doi:10.15252/embj.2021108083), 2021-07-13

**Fig. 4: Mitochondrial fractionation, HoxA, HoxB, and CitA Western Blot**

HoxA picture of the membrane with prestained marker

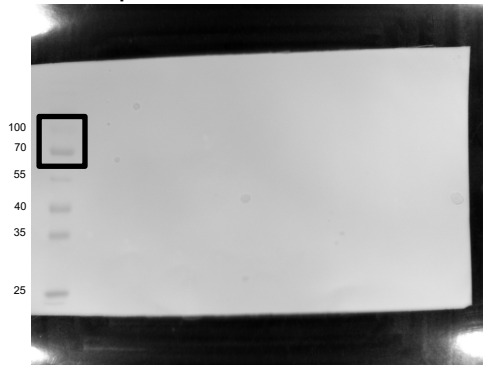

Western Blot, anti-GFP antibodies. The lower band is unspecific and occurs also in other blots.

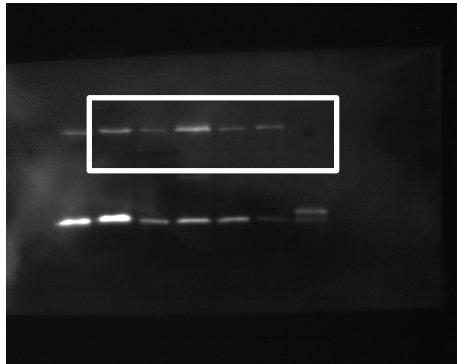

HoxB picture of the membrane with prestained marker

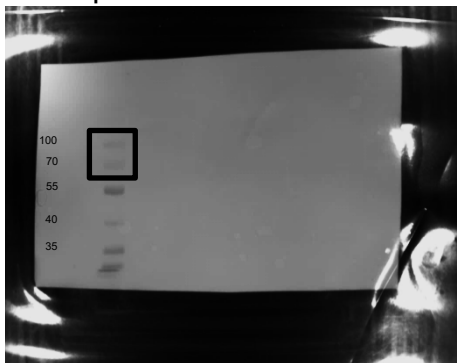

Western Blot, anti-GFP antibodies

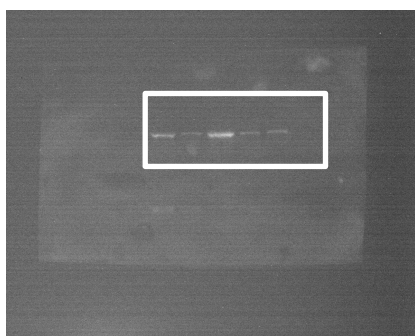

CitA picture of the membrane with prestained marker

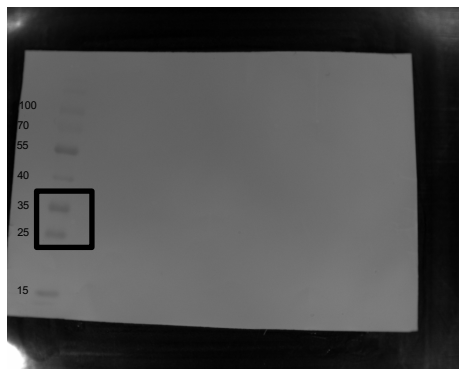

Western Blot, anti-GFP antibodies

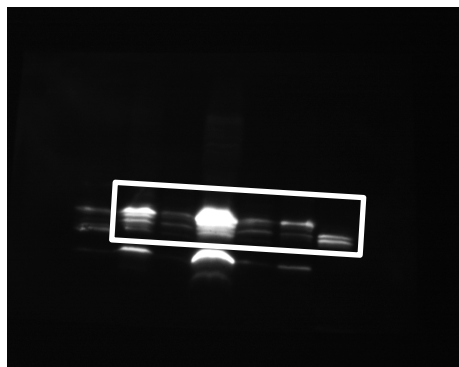

Supplement: EMBJ-40-e108083-s003.pdf [file EMBJ-40-e108083-s003.pdf]
