# Supplementary material for: Fungal phytochrome chromophore biosynthesis at mitochondria
Source: PubMed Central journal article supplement — EMBO J. 2021 Jul 13;40(17):e108083. doi: 10.15252/embj.2021108083 (PMC8447599; doi:10.15252/embj.2021108083), 2021-07-13

**Fig. 3: Zn<sup>2+</sup> Blot.** The lanes which are displayed in the inset of the figure are boxed.

Coomassie stain

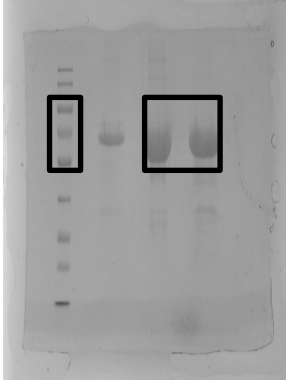

Zn<sup>2+</sup> blot

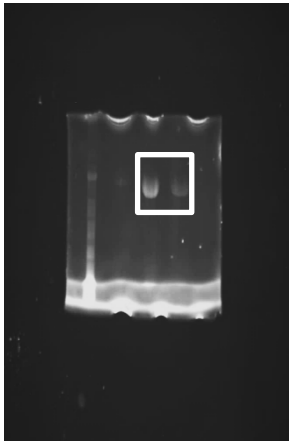

Supplement: EMBJ-40-e108083-s004.pdf [file EMBJ-40-e108083-s004.pdf]
