# Supplementary material for: Fungal phytochrome chromophore biosynthesis at mitochondria
Source: PubMed Central journal article supplement — EMBO J. 2021 Jul 13;40(17):e108083. doi: 10.15252/embj.2021108083 (PMC8447599; doi:10.15252/embj.2021108083), 2021-07-13
Supplement: EMBJ-40-e108083-s005.pdf [file EMBJ-40-e108083-s005.pdf]

## Appendix

### Fungal phytochrome chromophore biosynthesis at mitochondria

Christian Streng<sup>1</sup>, Jana Hartmann<sup>2</sup>, Kai Leister<sup>1</sup>, Norbert Krauß<sup>3</sup>, Tilman Lamparter<sup>3</sup>, Nicole Frankenberg-Dinkel<sup>2</sup>, Franco Weth<sup>4</sup>, Martin Bastmeyer<sup>4</sup>, Zhenzhong Yu<sup>5\*</sup> and Reinhard Fischer<sup>1\*</sup>

**running head:** phytochrome chromophore biosynthesis in fungi

**Address:** <sup>1</sup>Karlsruhe Institute of Technology (KIT) - South Campus  
Institute for Applied Biosciences  
Dept. of Microbiology  
Fritz-Haber-Weg 4  
D-76131 Karlsruhe, Germany  
Phone: +49-721-6084-4630  
Fax: +49-721-6084-4509  
E-mail: reinhard.fischer@KIT.edu  
Homepage: www.iab.kit.edu

<sup>2</sup>University of Kaiserslautern  
Dept. of Microbiology  
Paul-Ehrlich-Str. 23  
67663 Kaiserslautern, Germany

<sup>3</sup>Karlsruhe Institute of Technology (KIT) - South Campus  
Botanical Institute  
D-76131 Karlsruhe, Germany  
Phone: +49-721-608-45441  
Fax: +49-721-608-44193  
E-mail: tilman.lamparter@kit.edu  
Homepage: www.botanik.kit.edu

<sup>4</sup>Karlsruhe Institute of Technology (KIT) - South Campus  
Zoological Institute  
Fritz-Haber-Weg 4  
D-76131 Karlsruhe, Germany

<sup>5</sup> Nanjing Agricultural University  
The Key Laboratory of Plant Immunity  
Jiangsu Provincial Key Lab of Organic Solid Waste Utilization  
Jiangsu Collaborative Innovation Center for Solid Organic Waste  
Resource Utilization  
National Engineering Research Center for Organic-based Fertilizers  
210095 Nanjing, China  
E-mail: yuzhenzhong@njau.edu.cn  
Homepage: <http://re.njau.edu.cn/>

\* corresponding authors

## Appendix Figures

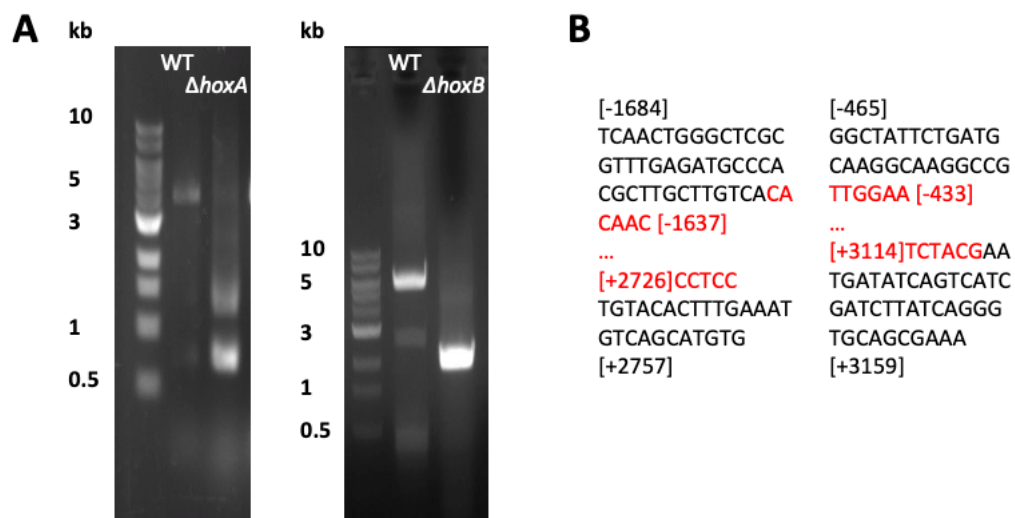

**Appendix Fig. S1: Deletion of the heme oxygenase genes. A,** Both genes were deleted using CRISPR/Cas9. We analyzed 20 transformants for each gene. PCR analysis of wild type and genomic DNA of the deletion mutants was performed to confirm the deletion event. The *hoxA* gene locus was amplified with HoxA\_check\_for and HoxA\_check\_rev and resulted in a 4.5 kb band. The same primer combination resulted in a 0.75 kb band in the deletion mutant. In the case of *hoxB*, the primer combination was: HoxB\_check\_for and HoxB\_check rev. The band obtained with wild type was 5.5 kb and the one with the mutant DNA was 1.75 kb. **B,** The PCR fragments of the deletion mutants obtained in **A** were sequenced. The sequences show the deletion event for *hoxA* (left) and *hoxB* (right). The numbers refer to the distance from the start codon. The red sequences are the direct border sequences of the deletion.

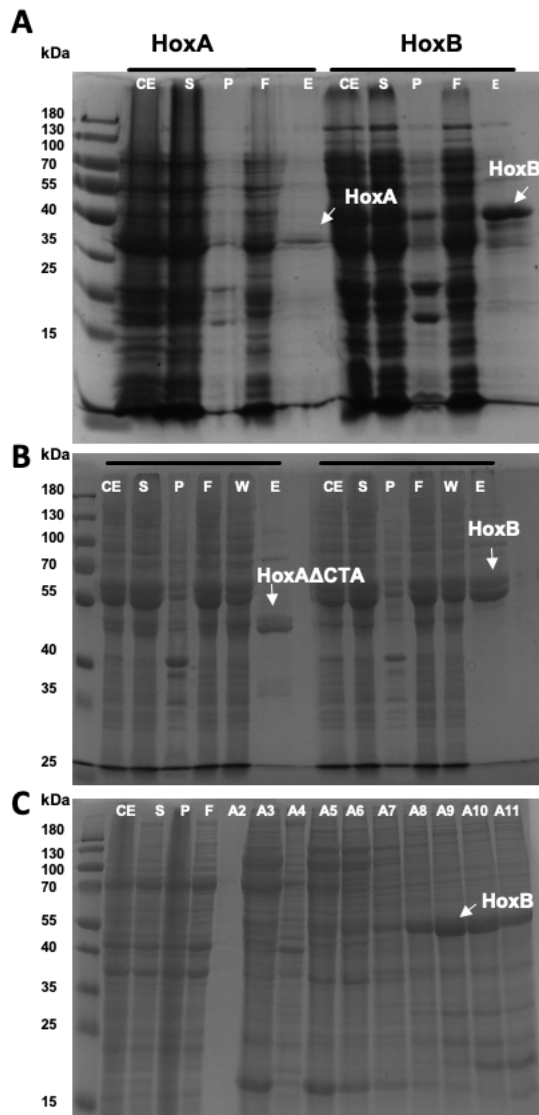

**Appendix Fig. S2: HO expression in *E. coli* and in *P. pastoris*.** **A**, HoxA and HoxB were expressed in *E. coli* for 20h at 15°C. Purification was performed using the Strep-tag system. HoxA remained largely in the insoluble pellet, while HoxB was soluble. HoxB was inactive in biochemical assays. **B**, HoxA and HoxB were purified like in **a**, but the C-terminal anchor (CTA) was deleted from HoxA resulting in a soluble form (HoxAΔCTA). **A**, **B**, Protein fractions were separated in an SDS PAGE analysis. Fractions are: Crude extract (CE), supernatant 1 (S), pellet (P), flow through (F), eluate (E). **C**, HoxB was expressed in *P. pastoris* for 2.5 days at 30°C. The SDS PAGE shows the fractions of the purification as in **A**, **B** and in addition fractions A2-A11 from the Mono S cation exchanger.

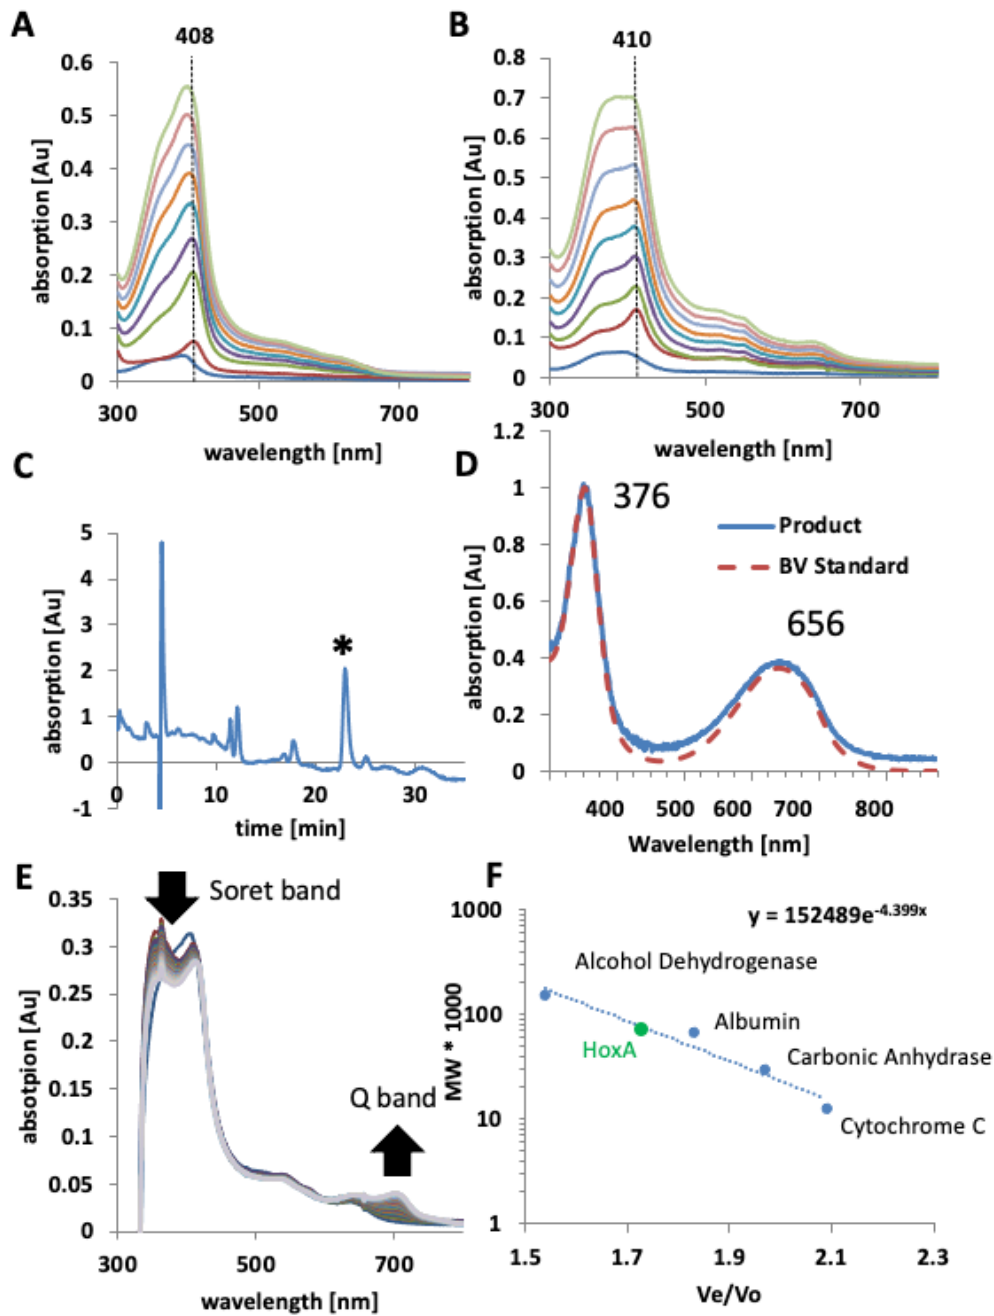

**Appendix Fig. S3: Biochemical analyses of HoxA and HoxB.** **A**, A spectrum of a solution with 1  $\mu\text{M}$  hemin was recorded (lower blue line). Afterwards 10  $\mu\text{M}$  HoxA was added. Subsequently repeatedly 1  $\mu\text{M}$  hemin was added and the spectrum recorded each time. A peak at 408 nm appeared (dashed line). **B**, HoxB was expressed in *P. pastoris* for 2.5 days. Purification was performed using a Mono S column. Measurement like in **A**. **C**, HPLC analysis of the products obtained in the heme oxygenase assay. 25  $\mu\text{M}$  HoxA and HoxB were incubated with 10  $\mu\text{M}$  hemin, 1.5 mg/ml BSA, 4.6  $\mu\text{M}$  petF (spinach ferredoxin), 0.025 U/ml petH (spinach ferredoxin reductase), 10  $\mu\text{M}$  catalase, 5 mM Tiron, 1.05 mM glucose-6-phosphate, 0.105  $\mu\text{M}$  NADP<sup>+</sup> and 0.15 U/ml glucose-6-phosphate-dehydroxygenase. The resulting peak in the HPLC profile (asterisk) was analyzed spectroscopically and resembled biliverdin **D**. **E**, To the heme oxygenase assay (from **C**) 300  $\mu\text{g}$  PGP was added. Spectra were recorded every 30 sec. for 10 min. The Soret band of hemin decreased, while the Q-band of the PGP Pr form (705 nm) increased (arrows). **F**, Calibration of the SEC column. Standards were alcohol dehydrogenase (150 kDa), albumin (66 kDa), carbonic anhydrase (29 kDa), and cytochrome C (12.4 kDa). ( $V_e$  = volume elution;  $V_o$  = void volume).

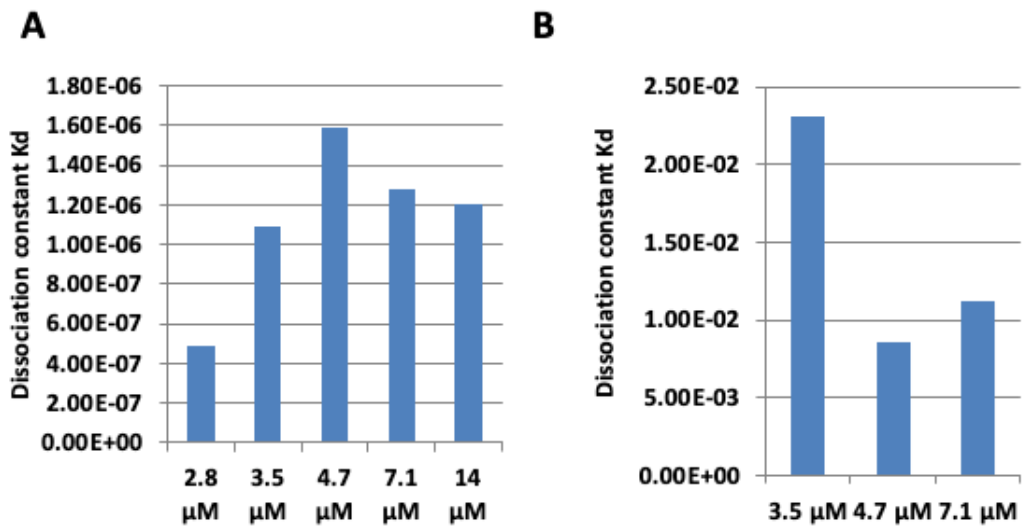

**Appendix Fig. S4: Analysis of the calculated dissociation constant (Kd) for each concentration of the interaction of HO and the phytochrome photosensory domain *in vitro* from Fig. 6. Biolayer interferometry analysis with Apo-PGP (A) and holo-PGP (B). Each Kd was calculated for the indicated concentration separately to compare consistency over the range.**

**Appendix Table S1: Strains used in this study.**

| <b>Strain</b>              | <b>Genotype</b>                                                   | <b>Reference</b>                  |
|----------------------------|-------------------------------------------------------------------|-----------------------------------|
| <b><i>A. nidulans</i></b>  |                                                                   |                                   |
| SKV103                     | <i>pyrG89; pyroA4; veA+</i>                                       | (Vienken & Fischer, 2006)         |
| SKV103                     | <i>pyrG89; pyroA4; veA+</i>                                       | (Vienken <i>et al</i> , 2005)     |
| SChS27                     | <i>alcA::GFP-hoxA ::pyr4 in SKV103</i>                            | This study                        |
| SChS28                     | <i>alcA::GFP-hoxB ::pyr4 in SKV103</i>                            | This study                        |
| SChS29                     | <i>alcA::NYFP-hoxA ::pyro and alcA::CYFP-hoxA::pyr4 in SKV103</i> | This study                        |
| SChS30                     | <i>alcA::NYFP-hoxA ::pyro and alcA::CYFP-fphA::pyr4 in SKV103</i> | This study                        |
| SChS31                     | <i>alcA::NYFP-hoxB ::pyro and alcA::CYFP-fphA::pyr4 in SKV103</i> | This study                        |
| SChS32                     | <i>alcA::NYFP-hoxB ::pyro and alcA::CYFP-hoxA::pyr4 in SKV103</i> | This study                        |
| SChS33                     | <i>alcA::NYFP-hoxB ::pyro and alcA::CYFP-hoxB::pyr4 in SKV103</i> | This study                        |
| SChS37                     | <i>alcA::mEOS-hoxA ::pyr4 in SKV103</i>                           | This study                        |
| SChS38                     | <i>alcA::mEOS-hoxB ::pyr4 in SKV103</i>                           | This study                        |
| SChS40                     | <i>alcA(p)::GFP-HoxA<math>\Delta</math>CTA::pyroA in SKV103</i>   | This study                        |
| SChS41                     | <i>alcA(p)::GFP-CTA::pyroA in SKV103</i>                          | This study                        |
| SChS43                     | <i>alcA(p)::GFP-HoxA<math>\Delta</math>CTA::pyroA in SKV103</i>   | This study                        |
| SChS44                     | <i>alcA(p)::GFP-CTA::pyroA in SKV103</i>                          | This study                        |
| <b><i>A. alternata</i></b> |                                                                   |                                   |
| ATCC 66981                 | <i>A. alternata</i> wild type                                     | Christopher Lawrence (Blacksburg, |

|        |                                                                              |                                    |
|--------|------------------------------------------------------------------------------|------------------------------------|
|        |                                                                              | VA)                                |
| SChS25 | <i>ΔhoxA in SMW24</i>                                                        | This study                         |
| SChS26 | <i>ΔhoxB in SMW24</i>                                                        | This study                         |
| SOI1   | <i>fphA</i> mutant <i>ΔfphA528</i><br>528 nucleotides deleted by CRISPR Cas9 | This study                         |
| SMW24  | <i>ΔpyrG in ATCC66981</i>                                                    | (Wenderoth<br><i>et al</i> , 2019) |

### ***E. coli***

|       |                                                                                                                                                                               |                         |
|-------|-------------------------------------------------------------------------------------------------------------------------------------------------------------------------------|-------------------------|
| Top10 | F <sup>-</sup> <i>mcrA</i> cr <i>mrr-hsdRMS-mcrBC</i> ) $\Phi$<br><i>0lacZac hsd lacX74 recA1 araD139</i><br><i>sd araleu)7697 galU galK rpsL</i><br>(StrR) <i>endA1 nupG</i> | Invitrogen,<br>Leek, NL |
| BL21  | F <sup>-</sup> <i>ompT hsdS<sub>B</sub> (r<sub>B</sub><sup>-</sup> m<sub>B</sub><sup>-</sup>) gal dcm</i> (DE3)                                                               | Novagen,<br>Darmstadt   |

### ***P. pastoris***

|        |                                       |            |
|--------|---------------------------------------|------------|
| G115   | His-                                  | Invitrogen |
| SChS39 | <i>Aox1::HoxB-Strep::His</i> in GS115 | This study |

**Appendix Table S2: Oligonucleotides used in this study.**

| <b>Name</b>               | <b>Sequence (from 5' to 3')</b>                                                                                  | <b>Description</b>                      |
|---------------------------|------------------------------------------------------------------------------------------------------------------|-----------------------------------------|
| AlccgA-RT-F               | GTCAACTCTGTCAAGAACGC                                                                                             |                                         |
| AlccgA-RT-R               | TTGATCTTGTCAACCAGCAGC                                                                                            | RT-qPCR primers for <i>A. alternata</i> |
| Alh2b-RT-F                | ACAAGAAGAAGCGCACCAAG                                                                                             |                                         |
| Alh2b-RT-R                | CGTTGACGAAAGAGTTGAGAA                                                                                            |                                         |
| Alt_HemeO1_pro to1_for    | GTC CGT GAG GAC GAA ACG AGT AAG<br>CTC GTC AGG GCA GAG ACG CTG TGC<br>CGG TTT TAG AGC TAG AAA TAG CAA<br>GTT AAA |                                         |
| Alt_HemeO1_pro to1_HH_rev | GAC GAG CTT ACT CGT TTC GTC CTC<br>ACG GAC TCA TCA GAG GGC ACG GTG<br>ATG TCT GCT CAA GCG                        |                                         |
| Alt_HemeO1_pro to2_for    | GTC CGT GAG GAC GAA ACG AGT AAG<br>CTC GTC GAC ATT TCT CAG GAG GCC<br>AGG TTT TAG AGC TAG AAA TAG CAA<br>GTT AAA |                                         |
| Alt_HemeO1_pro to2_HH_rev | GAC GAG CTT ACT CGT TTC GTC CTC<br>ACG GAC TCA TCA GGA CAT TCG GTG<br>ATG TCT GCT CAA GCG                        | Deletion of <i>hoxA</i> and <i>hoxB</i> |
| Alt_HemeO2_pro to1_for    | GTC CGT GAG GAC GAA ACG AGT AAG<br>CTC GTC GGC ATG CCA ACC CTG ACA<br>TAG TTT TAG AGC TAG AAA TAG CAA<br>GTT AAA |                                         |
| Alt_HemeO2_pro to1_HH_rev | GAC GAG CTT ACT CGT TTC GTC CTC<br>ACG GAC TCA TCA GGG CAT GCG GTG<br>ATG TCT GCT CAA GCG                        |                                         |
| Alt_HemeO2_pro to2_for    | GTC CGT GAG GAC GAA ACG AGT AAG<br>CTC GTC AAC GAT AAC CGG AAT CCA<br>TTG TTT TAG AGC TAG AAA TAG CAA<br>GTT AAA |                                         |



|                              |                                                                                           |                                                               |
|------------------------------|-------------------------------------------------------------------------------------------|---------------------------------------------------------------|
| Alt_HemeO2_pro<br>to2_HH_rev | GAC GAG CTT ACT CGT TTC GTC CTC<br>ACG GAC TCA TCA GAA CGA TCG GTG<br>ATG TCT GCT CAA GCG |                                                               |
| HoxA_check_for               | ACG AGG AGG AGA CCA AGT ACC                                                               |                                                               |
| HoxA_check_rev               | GCT TGC ACA TGA TAG TCA CAT CAC                                                           | Sequencing of<br>the deletion                                 |
| HoxB_check_for               | GGC GAT GAT GTG GGG ATC G                                                                 |                                                               |
| HoxB_check_rev               | CCG ATG CAT CAC TCG CTT G                                                                 |                                                               |
| pASK_AltHOXAs<br>yn fwd      | GTG AAA TGA ATA GTT CGA CAA AAA<br>TCT AGA TGC TTG AGA AGC AAC AAC A                      | Expression of<br>HoxA                                         |
| pASK_AltHOXAs<br>yn rev      | GGT GGC TCC AAG CGC TGA GAC CAT<br>GTT GAA TCT TGA AAA GGG TTA                            |                                                               |
| HoxA_Anchordel<br>_for       | CAT GGT CTC AGC GCT TGG AG                                                                | Construction of<br>HoxA $\Delta$ CTA for<br>Expression        |
| HoxA_Anchordel<br>_rev       | CGG GCG GCG TAA AAA CGT C                                                                 |                                                               |
| pASK_AltHOXBs<br>yn fwd      | GTG AAA TGA ATA GTT CGA CAA AAA<br>TCT AGA TGG GTC GTC ACG CTA ACC<br>C                   | Expression of<br>codon<br>optimized<br>HoxB in <i>E. coli</i> |
| pASK_AltHOXBs<br>yn rev      | GGT GGC TCC AAG CGC TGA GAC CAT<br>GTG AGC CCT GCC CAA CGG ATT                            |                                                               |
| HoxB_unopt_Sal<br>I_for      | GAG GTC GAC ATG GGC AGG CAT GCC<br>AAC                                                    | Expression of<br>native HoxB in<br><i>E. coli</i>             |
| HoxB_unopt_Pst<br>I_rev      | CTC CTG CAG CGA GCC CTG GCC CAC<br>ACT C                                                  |                                                               |
| pPIC_HoxB_uno<br>pt_for      | AAA AAC AAC TAA TTA TTC GAA GGA<br>TCC GCC ACC ATG GGC AGG CAT GCC<br>A                   | Expression of<br>HoxB in <i>P.<br/>pastoris</i>               |
| pPIC_HoxB_uno<br>pt_rev      | CTA AGG CGA ATT AAT TCG CGG CCG<br>CCT TAT TAT TTT TCG AAC TGC GGG<br>TGG                 |                                                               |
| pACYC_AltHoxA                | TTA AGT ATA AGA AGG AGA TAT ACA                                                           | Coexpression                                                  |

|                             |                                                                                              |                                               |
|-----------------------------|----------------------------------------------------------------------------------------------|-----------------------------------------------|
| syn fwd                     | TAT GCT TGA GAA GCA ACA ACA                                                                  | of HoxA, HoxB<br>or HoxA and<br>HoxB with PGP |
| pACYC_AltHoxA<br>syn rev    | GGT GGC AGC AGC CTA GGT TAA TTA<br>ACG ATG ATG GTG ATG GTG GTG GTG<br>GTG ATG GTG GTG GTG TT |                                               |
| pACYC_AltHoxB<br>syn fwd    | GGT GGC AGC AGC CTA GGT TAA TTA<br>ACG ATG ATG GTG ATG GTG GTG GTG<br>ATG ATG GTG ATG ATG TG |                                               |
| pACYC_AltHoxB<br>syn rev    | TTA AGT ATA AGA AGG AGA TAT ACA<br>TAT GGG TCG TCA CGC TAA CCC                               |                                               |
| HoxB_dualexpre<br>ssion_for | GAT CCG AAT TCG AGC TCG GCG CGC<br>CGG ATG GGT CGT CAC GCT AAC C                             |                                               |
| HoxB_dualexpre<br>ssion_rev | GTT CGA CTT AAG CAT TAT GCG GCC<br>GCT TAT GAG CCC TGC CCA ACG GAT<br>TCC                    |                                               |
| HoxB_unopt_pA<br>CYC_for    | TTA AGT ATA AGA AGG AGA TAT ACA<br>TAT GGG CAG GCA TGC CAA CCC                               |                                               |
| HoxB_unopt_pA<br>CYC_rev    | GGT GGC AGC AGC CTA GGT TAA TTA<br>ATT AAT GAT GGT GAT GAT GGT GCG<br>AGC CCT GGC CCA CAC TC |                                               |
| pET_AltHoxAsyn<br>fwd       | CTG GTG CCG CGC GGC AGC CAT ATG<br>CTT GAG AAG C                                             |                                               |
| pET_AltHoxAsyn<br>rev       | CAG TGG TGG TGG TGG TGG TGC TCG<br>AGT TGA ATC TTG AAA AG                                    |                                               |
| pET_AltHoxBsyn<br>fwd       | CTG GTG CCG CGC GGC AGC CAT ATG<br>GGT CGT CAC                                               |                                               |
| pET_AltHoxBsyn<br>rev       | CAG TGG TGG TGG TGG TGG TGC TCG<br>AGT GAG CCC TGC C                                         |                                               |
| HoxA_AscI_for               | GTA GGC GCG CCG ATG CTG GAG AAG<br>CAG CAG C                                                 | Construction of<br>YFP and GFP<br>plasmids    |
| HoxA_PacI_rev               | CAA TTA ATT AAT CAC TGG ATC TTG<br>AAC AGC GTG                                               |                                               |
| HoxB_AscI_for               | GTA GGC GCG CCG ATG GGC AGG CAT                                                              |                                               |

GCC AAC

---

HoxB\_Pacl\_rev CAA TTA ATT AAC TAC GAG CCC TGG  
CCC AC

---

HoxA\_GFP\_anchor TGG CCT CCT GAG AAA TGT C  
del\_rev

---

HoxA\_GFP\_anchor TGA TTA ATT AAG GAT CCT CTA GAG TCG  
del\_for

---

HoxA\_onlyCTA\_T4 GCA TTA ATT AAT CAC TGG ATC TTG AAC AGC  
\_rev GTG AC

---

HoxA\_onlyCTA\_T4 GTA GGC GCG CCG ATG AGT GAC CCG TTC AAG  
\_for ACA TTT C

---

**Appendix Table S3: Plasmids used in this study.**

| Plasmid           | Insert                                                                                                       | Source                        |
|-------------------|--------------------------------------------------------------------------------------------------------------|-------------------------------|
| pFC330            | tef1(p)::cas9::tef1(t);<br>Afp <sub>yrG</sub> ; amp <sup>R</sup> ; AMA1                                      | (Nodvig <i>et al.</i> , 2015) |
| pFC332            | tef1(p)::cas9::tef1(t); hph;<br>amp <sup>R</sup> ; AMA1                                                      | (Nodvig <i>et al.</i> , 2015) |
| pFC334            | tef1(p)::cas9::tef1(t);<br>gpdA(p)::sgRNA-<br>AnyA::trpC(t);<br>Afp <sub>yr4</sub> ; amp <sup>R</sup> ; AMA1 | (Nodvig <i>et al.</i> , 2015) |
| pASK-IBA3_FphAsyn | FphA in pASK-IBA3+                                                                                           | This study                    |
| BphO_pACYCDuet    | Bpho in pACYC-DUET1                                                                                          | (Brandt <i>et al.</i> , 2008) |
| pChS11            | Protospacer1 for $\Delta$ <i>hoxA</i><br>in 332 with <i>PacI</i>                                             | This study                    |
| pChS12            | Protospacer2 for $\Delta$ <i>hoxA</i><br>in 330 with <i>PacI</i>                                             | This study                    |
| pChS13            | Protospacer1 for $\Delta$ <i>hoxB</i><br>in 330 with <i>PacI</i>                                             | This study                    |
| pChS14            | Protospacer2 for $\Delta$ <i>hoxB</i><br>in 332 with <i>PacI</i>                                             | This study                    |
| pChS15            | HoxAsyn in pASK-<br>IBA3+ with <i>XbaI</i> and<br><i>NcoI</i>                                                | This study                    |
| pChS16            | HoxA $\Delta$ CTAsyn in<br>pASK-IBA3+ with <i>XbaI</i><br>and <i>NcoI</i>                                    | This study                    |
| pChS18            | HoxAsyn in pACYC-<br>DUET1 with <i>NdeI</i> and<br><i>PacI</i>                                               | This study                    |

|        |                                                                |            |
|--------|----------------------------------------------------------------|------------|
| pChS19 | HoxBsyn in pACYC-DUET1+ with <i>NdeI</i> and <i>PacI</i>       | This study |
| pChS20 | HoxAsyn in pET-28a with <i>NdeI</i> and <i>XhoI</i>            | This study |
| pChS21 | HoxBsyn in pET-28a with <i>NdeI</i> and <i>XhoI</i>            | This study |
| pChS22 | alcA::GFP-HoxA, <i>pyr4</i> with <i>Ascl</i> and <i>PacI</i>   | This study |
| pChS23 | alcA::GFP-HoxB, <i>pyr4</i> with <i>Ascl</i> and <i>PacI</i>   | This study |
| pChS23 | alcA::NYFP-HoxA, <i>pyroA</i> with <i>Ascl</i> and <i>PacI</i> | This study |
| pChS22 | alcA::CYFP-HoxA, <i>pyr4</i> with <i>Ascl</i> and <i>PacI</i>  | This study |
| pChS23 | alcA::NYFP-HoxB, <i>pyroA</i> with <i>Ascl</i> and <i>PacI</i> | This study |
| pChS22 | alcA::CYFP-HoxB, <i>pyr4</i> with <i>Ascl</i> and <i>PacI</i>  | This study |
| pChS35 | alcA::mEOS-HoxA, <i>pyr4</i> with <i>Ascl</i> and <i>PacI</i>  | This study |
| pChS36 | alcA::mEOS-HoxB, <i>pyr4</i> with <i>Ascl</i> and <i>PacI</i>  | This study |

|        |                                                                             |            |
|--------|-----------------------------------------------------------------------------|------------|
| pChS37 | HoxB-Strep in<br>PPIC3.5K with <i>Bam</i> HI<br>and <i>Not</i> I            | This study |
| pKL6   | HoxB in pACYC-DUET1<br>with <i>Nde</i> I and <i>Pac</i> I                   | This study |
| pKL7   | HoxAsyn and HoxB in<br>pACYC-DUET1 with<br><i>Hind</i> III and <i>Nco</i> I | This study |
| PChS43 | <i>alcA(p)::GFP-<br/>HoxAΔCTA::pyr4; ampR</i>                               | This study |
| PChS44 | <i>alcA(p)::GFP-CTA::pyr4;<br/>ampR</i>                                     | This study |

## References

- Brandt S, von Stetten D, Günther M, Hildebrandt P, Frankenberg-Dinkel N (2008) The fungal phytochrome FphA from *Aspergillus nidulans*. *J Biol Chem* 283: 34605-34614
- Nodvig CS, Nielsen JB, Kogle ME, Mortensen UH (2015) A CRISPR-Cas9 system for genetic engineering of filamentous fungi. *PLoS One* 10: e0133085
- Vienken K, Fischer R (2006) The Zn(II)<sub>2</sub>Cys<sub>6</sub> putative transcription factor NosA controls fruiting body formation in *Aspergillus nidulans*. *Mol Microbiol* 61: 544-554
- Vienken K, Scherer M, Fischer R (2005) The Zn(II)<sub>2</sub>Cys<sub>6</sub> transcription factor RosA (repressor of sexual development) triggers early developmental decisions in the filamentous fungus *Aspergillus nidulans*. *Genetics* 169: 619-630
- Wenderoth M, Garganese F, Schmidt-Heydt M, Soukup ST, Ippolito A, Sanzani SM, Fischer R (2019) Alternariol as virulence and colonization factor of *Alternaria alternata* during plant infection. *Mol Microbiol* 112: 131-146
